# Supplementary material for: Complexation of β-cyclodextrin with dual molecular probes bearing fluorescent and paramagnetic moieties linked by short polyether chains
Source: Royal Society of Chemistry journal article supplement (doi:10.1039/c7cp05276f), 2017-01-01
Supplement: c7cp05276f1.pdf [file c7cp05276f1.pdf]

**Complexation of  $\beta$ -cyclodextrin with dual molecular probes bearing fluorescent  
and paramagnetic moieties linked by short polyether chains**

Sorin Mocanu,<sup>a</sup> Iulia Matei\*,<sup>a</sup> Sorana Ionescu,<sup>b</sup> Victorita Tecuceanu,<sup>c</sup> Gabriela Marinescu,<sup>a</sup> Anca  
Leonties,<sup>a</sup> Petre Ionita,<sup>a,d</sup> Daniela Culita<sup>a</sup> and Gabriela Ionita\*,<sup>a</sup>

<sup>a</sup> "Ilie Murgulescu" Institute of Physical Chemistry of the Romanian Academy, 202 Splaiul Independentei, Bucharest  
060021, Romania. E-mail: ige@icf.ro

<sup>b</sup> Department of Physical Chemistry, University of Bucharest, Bd. Regina Elisabeta 4–12, 030018 Bucharest, Romania

<sup>c</sup> Organic Chemistry Centre of the Romanian Academy, 202B Splaiul Independentei, 78100 Bucharest, Romania

<sup>d</sup> Department of Organic Chemistry, Biochemistry and Catalysis, University of Bucharest, 90-92 Panduri, 050663  
Bucharest, Romania

**Table S1.** Fluorescence quantum yields ( $\Phi$ ) of Py(EG)<sub>n</sub>T dual probes;  $S_{\text{probe}}/S_{\text{PyCOO}^-}$  is the ratio of the integrated emission intensities of the probe and PyCOO<sup>-</sup>, indicating the extent of intramolecular quenching by the paramagnetic moiety

| <b>Probe</b>          | <b><math>\Phi</math></b> | <b><math>S_{\text{probe}}/S_{\text{PyCOO}^-}</math></b> |
|-----------------------|--------------------------|---------------------------------------------------------|
| Py(EG) <sub>1</sub> T | 0.096                    | 0.093                                                   |
| Py(EG) <sub>2</sub> T | 0.051                    | 0.064                                                   |
| Py(EG) <sub>3</sub> T | 0.159                    | 0.310                                                   |
| Py(EG) <sub>4</sub> T | 0.127                    | 0.173                                                   |
| Py(EG) <sub>5</sub> T | 0.151                    | 0.205                                                   |
| Py(EG) <sub>6</sub> T | 0.234                    | 0.246                                                   |
| Py(EG) <sub>1</sub>   | 0.556                    | 0.874                                                   |
| Py(EG) <sub>6</sub>   | 0.574                    | 0.913                                                   |

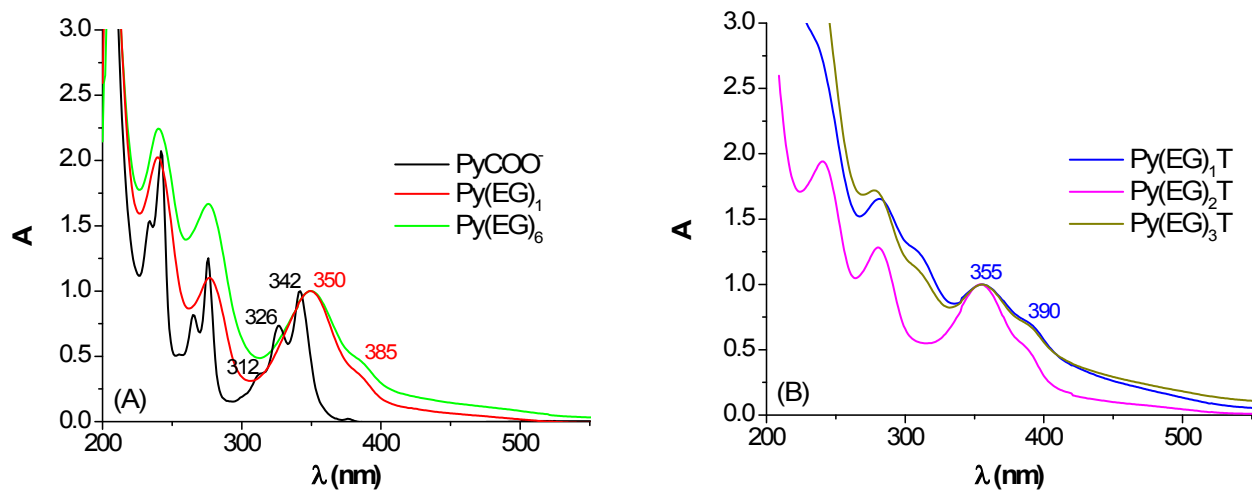

**Fig. S1.** Normalized absorption spectra of (A)  $\text{PyCOO}^-$  and relevant  $\text{Py(EG)}_n$  parent compounds, and (B) selected  $\text{Py(EG)}_n\text{T}$  dual probes, in pH 7.4 phosphate buffer at 20°C.

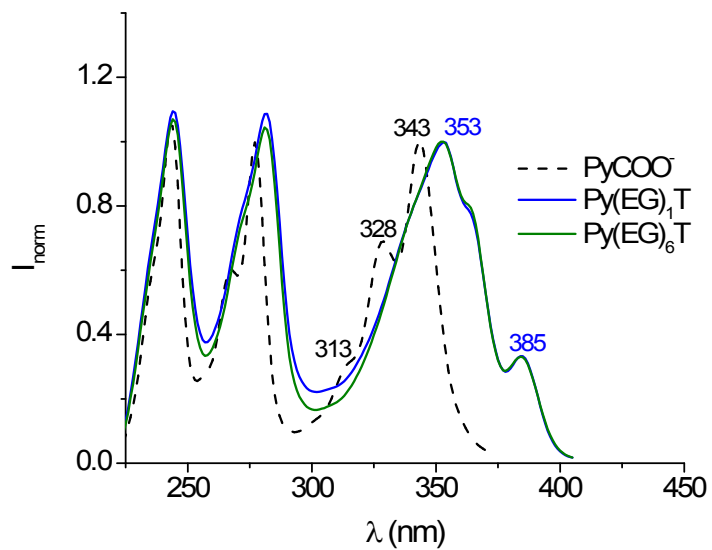

**Fig. S2.** Excitation spectra of  $\text{PyCOO}^-$  and selected  $\text{Py(EG)}_n\text{T}$  probes in pH 7.4 phosphate buffer at  $20^\circ\text{C}$ ;  $\lambda_{\text{em}} = 380$  nm for  $\text{PyCOO}^-$  and 415 nm for  $\text{Py(EG)}_n\text{T}$ .

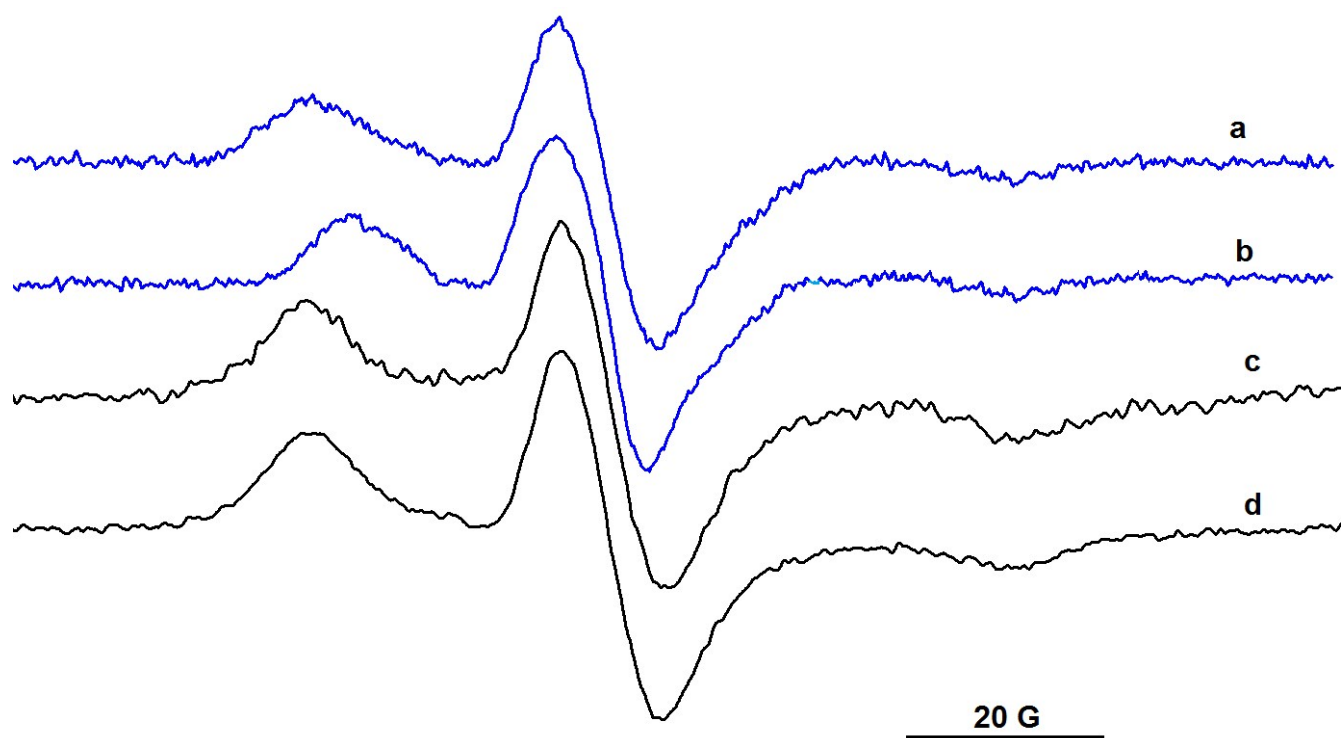

**Fig. S3.** The EPR spectra of Py(EG)<sub>1</sub>T in the absence (a) and in the presence of  $\beta$ -CD (b) and Py(EG)<sub>6</sub>T in the absence (c) and in the presence of  $\beta$ -CD (d) in water/glycerol (9:1). Concentration of  $\beta$ -CD is  $10^{-2}$  M.

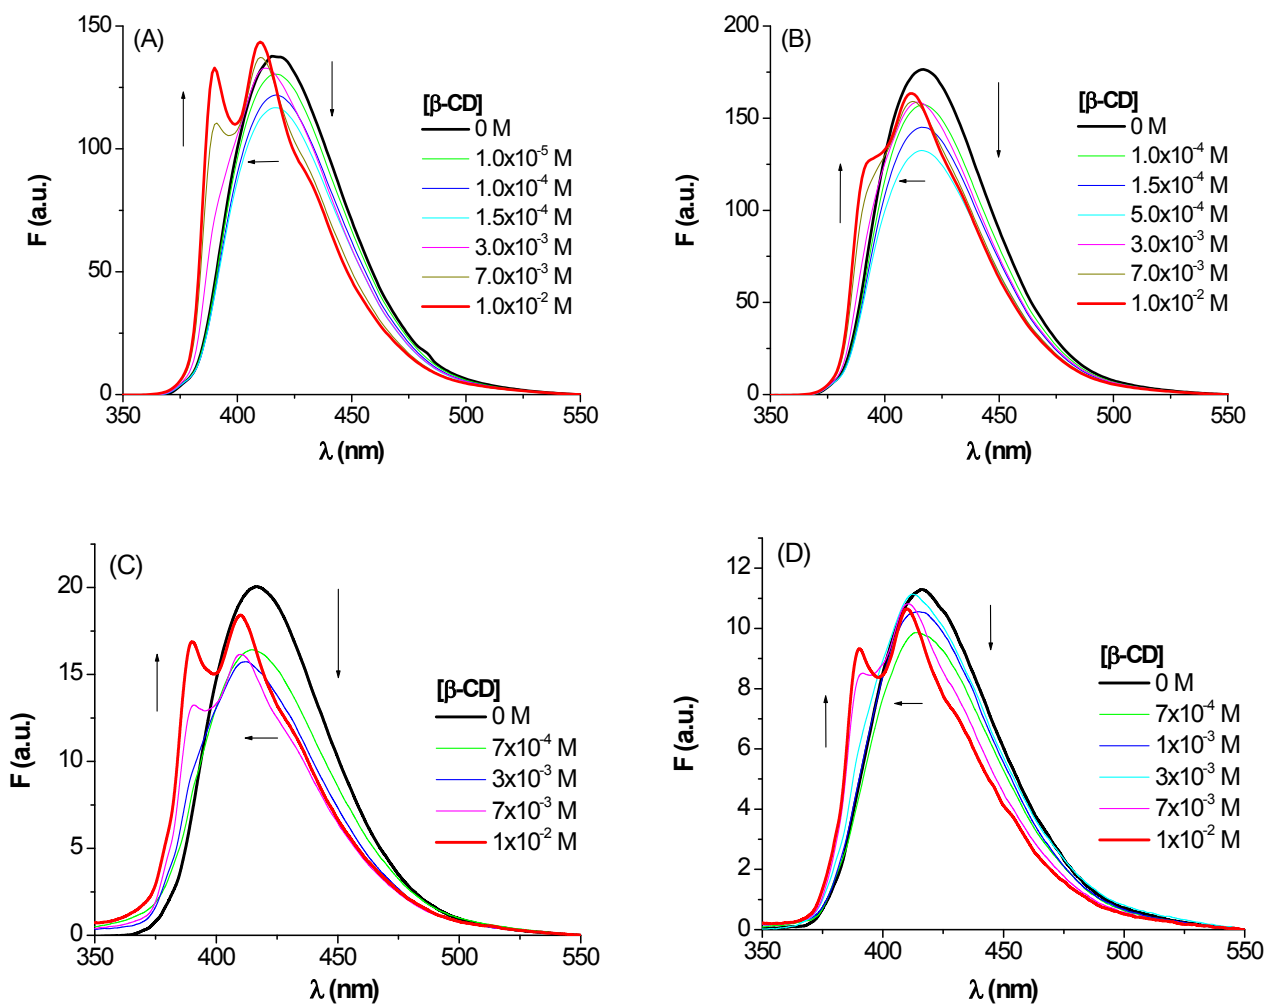

**Fig. S4.** Steady-state fluorescence spectra of (A) Py(EG)<sub>1</sub> and (B) Py(EG)<sub>6</sub> parent compounds, (C) Py(EG)<sub>1</sub>T and (D) Py(EG)<sub>6</sub>T dual probes in the presence of increasing concentrations of  $\beta$ -CD.

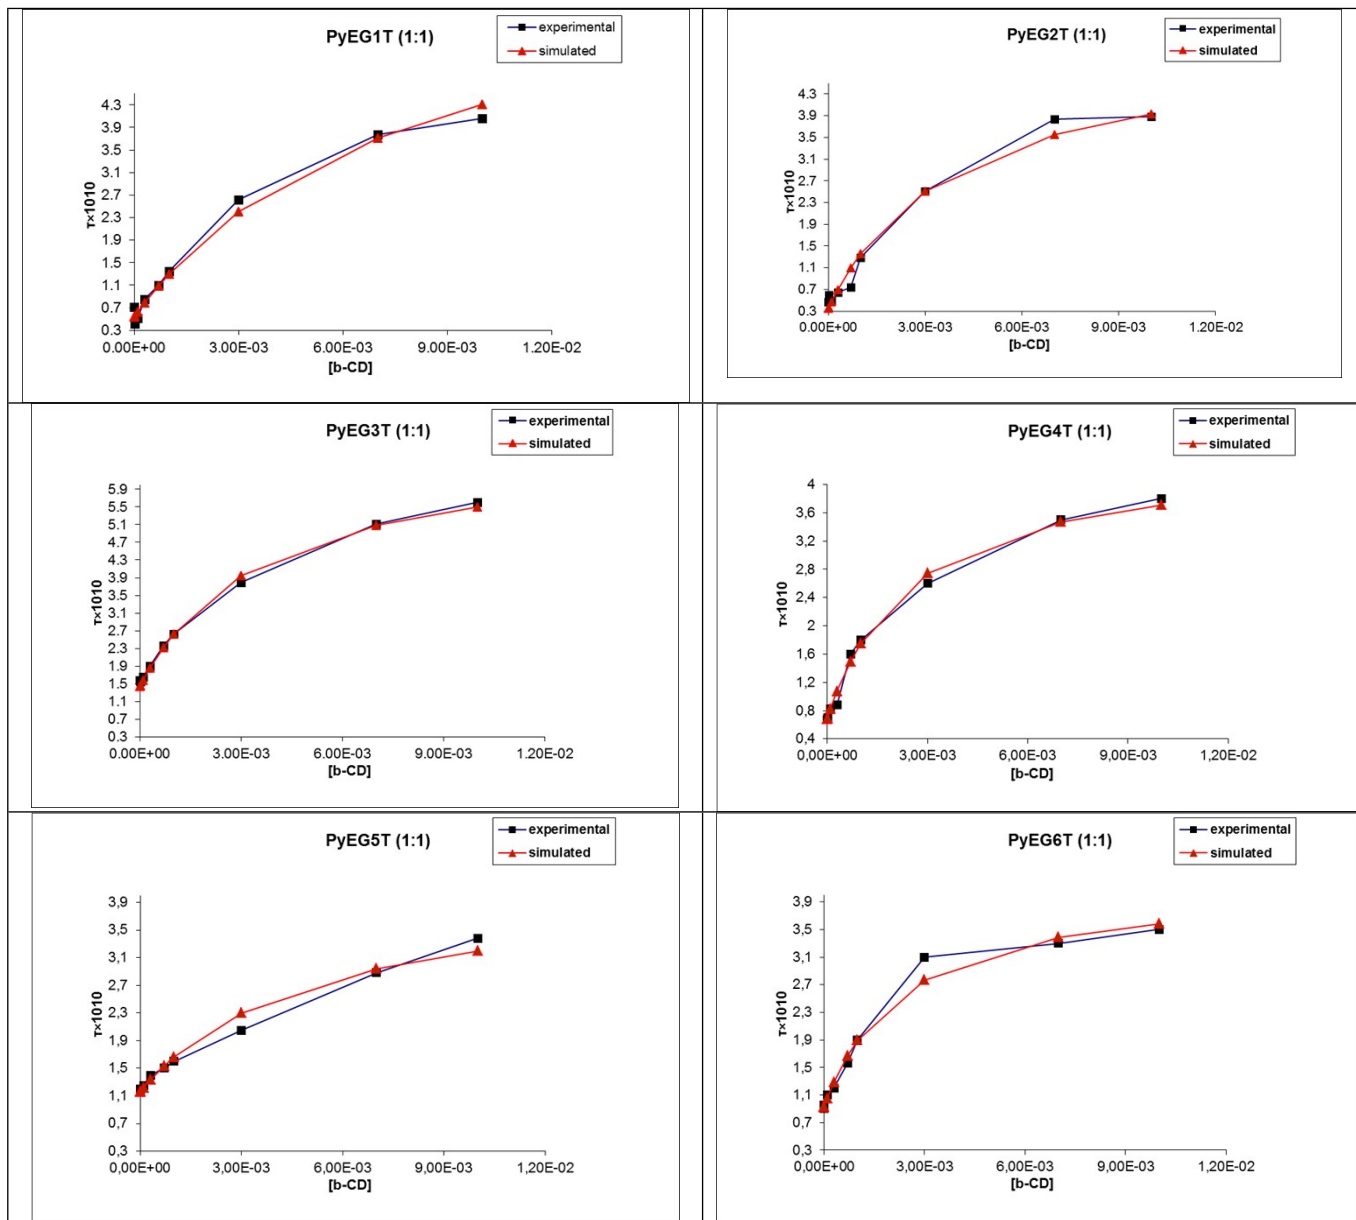

Fig. S5. Dependence of  $\tau_c$  on the  $\beta$ -CD concentration: experimental (blue) and best fit for 1:1 stoichiometry (red).

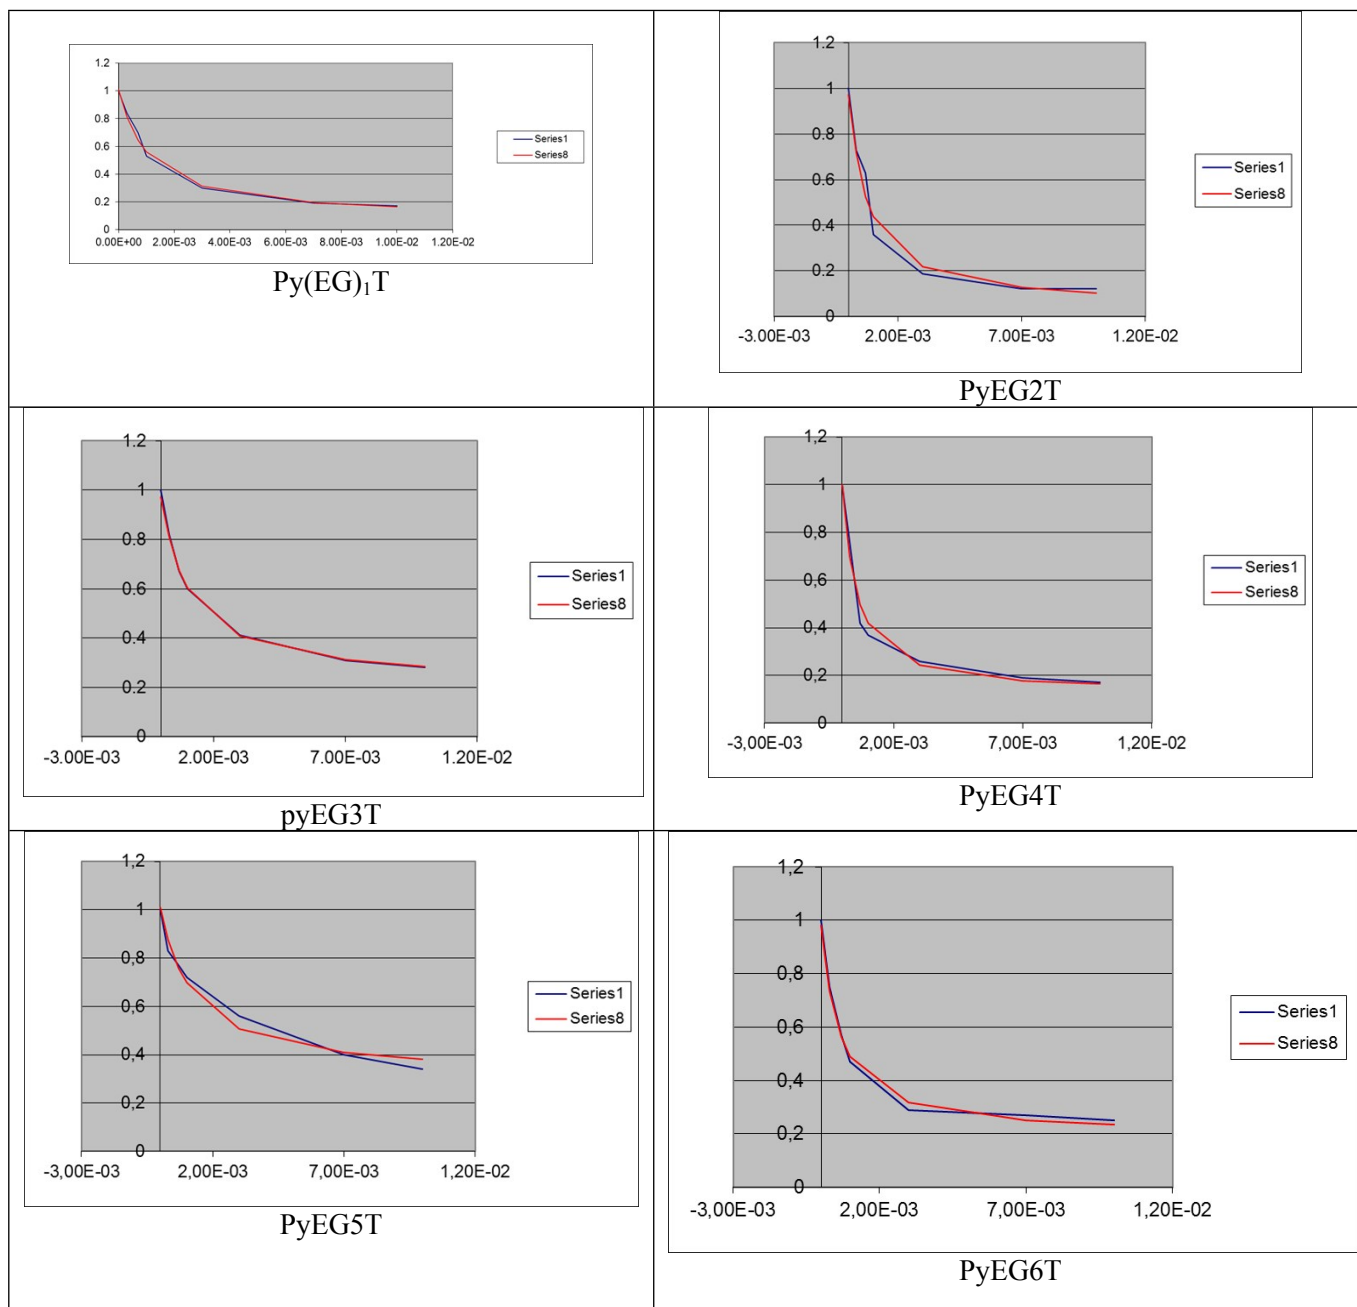

**Fig. S6.** Dependence of  $\tau_c$  on the  $\beta$ -CD concentration: experimental (blue) and best fit for 1:2 stoichiometry (red).



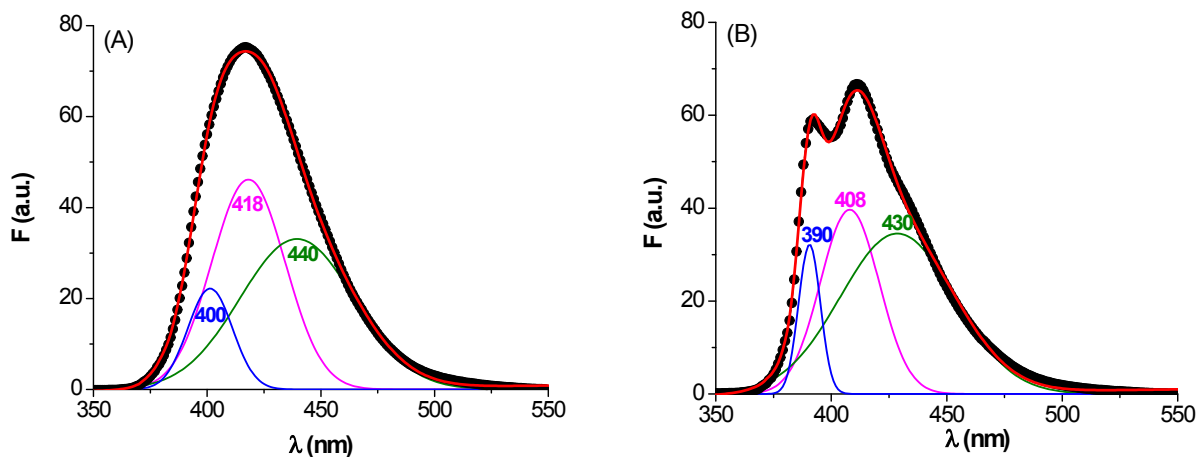

**Fig. S7.** Deconvoluted steady-state fluorescence spectra of Py(EG)<sub>4</sub>T in the absence (A) and in the presence (B) of 10<sup>-2</sup> M β-CD.

The association constants,  $K$ , characterizing the equilibria in solution have been determined according to eq. (S1) assuming a 1:1 stoichiometry of the interaction. In order to minimize band superposition effects, the  $K$  values have been computed employing the area ( $S$  in Table S2) of the band at ~440 nm, obtained by deconvolution. In the case of the probes that present little band superposition at ~450 nm, we checked that similar  $K$  values can be obtained when employing the decrease in fluorescence intensity at 445 nm.

$$S = \frac{S_0 + K S_c [CD]}{1 + K [CD]} \quad (\text{S1})$$

In eq. (S1),  $S_0$  and  $S_c$  are band areas of the guest in the absence of CD and of the 1:1 complex, respectively.

**Table S2.** Positions ( $\lambda$ , in nm) and relative areas (S, %) of the peaks in the deconvoluted emission spectra of Py(EG)<sub>n</sub>T dual probes in the absence and in the presence of  $\beta$ -CD

| Probe                 | [ $\beta$ -CD] (M) | $\lambda_1$ | S <sub>1</sub> | $\lambda_2$ | S <sub>2</sub> | $\lambda_3$ | S <sub>3</sub> |
|-----------------------|--------------------|-------------|----------------|-------------|----------------|-------------|----------------|
| Py(EG) <sub>1</sub> T | 0                  | 402.4       | 14.5           | 419.8       | 42.3           | 441.6       | 42.2           |
|                       | 10 <sup>-2</sup>   | 389.1       | 9.4            | 407.0       | 25.5           | 425.1       | 63.9           |
| Py(EG) <sub>2</sub> T | 0                  | 405.4       | 26.9           | 425.9       | 43.6           | 448.6       | 27.0           |
|                       | 10 <sup>-2</sup>   | 391.1       | 13.7           | 409.3       | 25.1           | 427.1       | 60.0           |
| Py(EG) <sub>3</sub> T | 0                  | 405.3       | 23.8           | 425.3       | 44.4           | 448.6       | 28.6           |
|                       | 10 <sup>-2</sup>   | 390.0       | 12.4           | 408.6       | 25.8           | 427.2       | 60.4           |
| Py(EG) <sub>4</sub> T | 0                  | 401.3       | 12.1           | 418.2       | 41.3           | 439.5       | 46.0           |
|                       | 10 <sup>-2</sup>   | 390.6       | 10.0           | 408.0       | 33.3           | 428.6       | 56.3           |
| Py(EG) <sub>6</sub> T | 0                  | 401.5       | 10.4           | 418.4       | 45.5           | 441.6       | 40.6           |
|                       | 10 <sup>-2</sup>   | 389.2       | 8.9            | 407.4       | 28.4           | 428.6       | 60.9           |

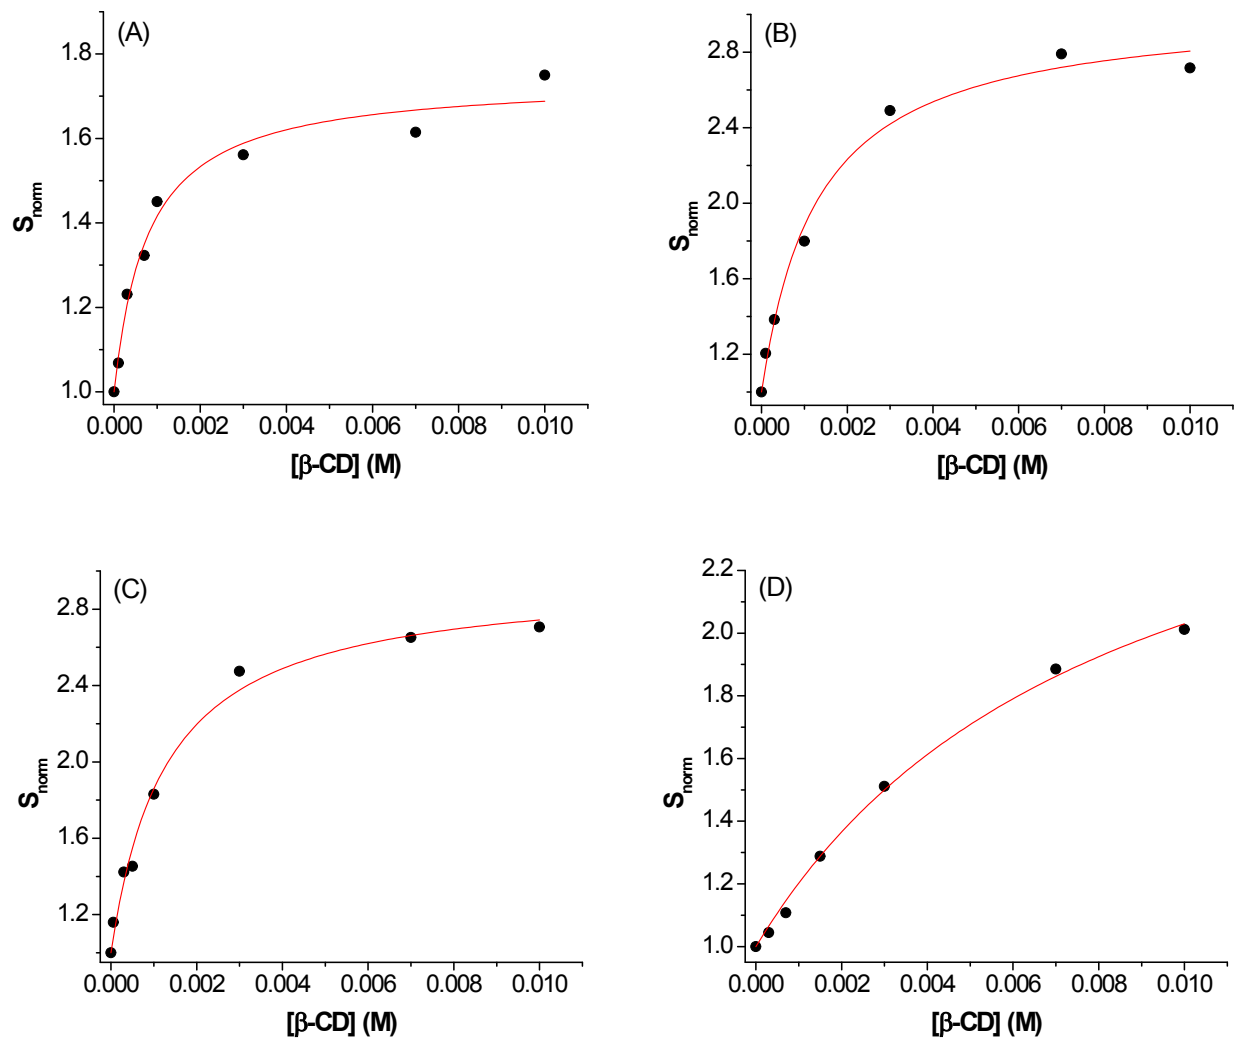

**Fig. S8.** Dependence of the normalized fluorescence emission on the  $\beta$ -CD concentration for selected Py(EG)<sub>n</sub>T probes: (A) Py(EG)<sub>1</sub>T, (B) Py(EG)<sub>2</sub>T, (C) Py(EG)<sub>3</sub>T and (D) Py(EG)<sub>6</sub>T. The solid lines represent the best fits according to eq. (S1) for 1:1 stoichiometry.

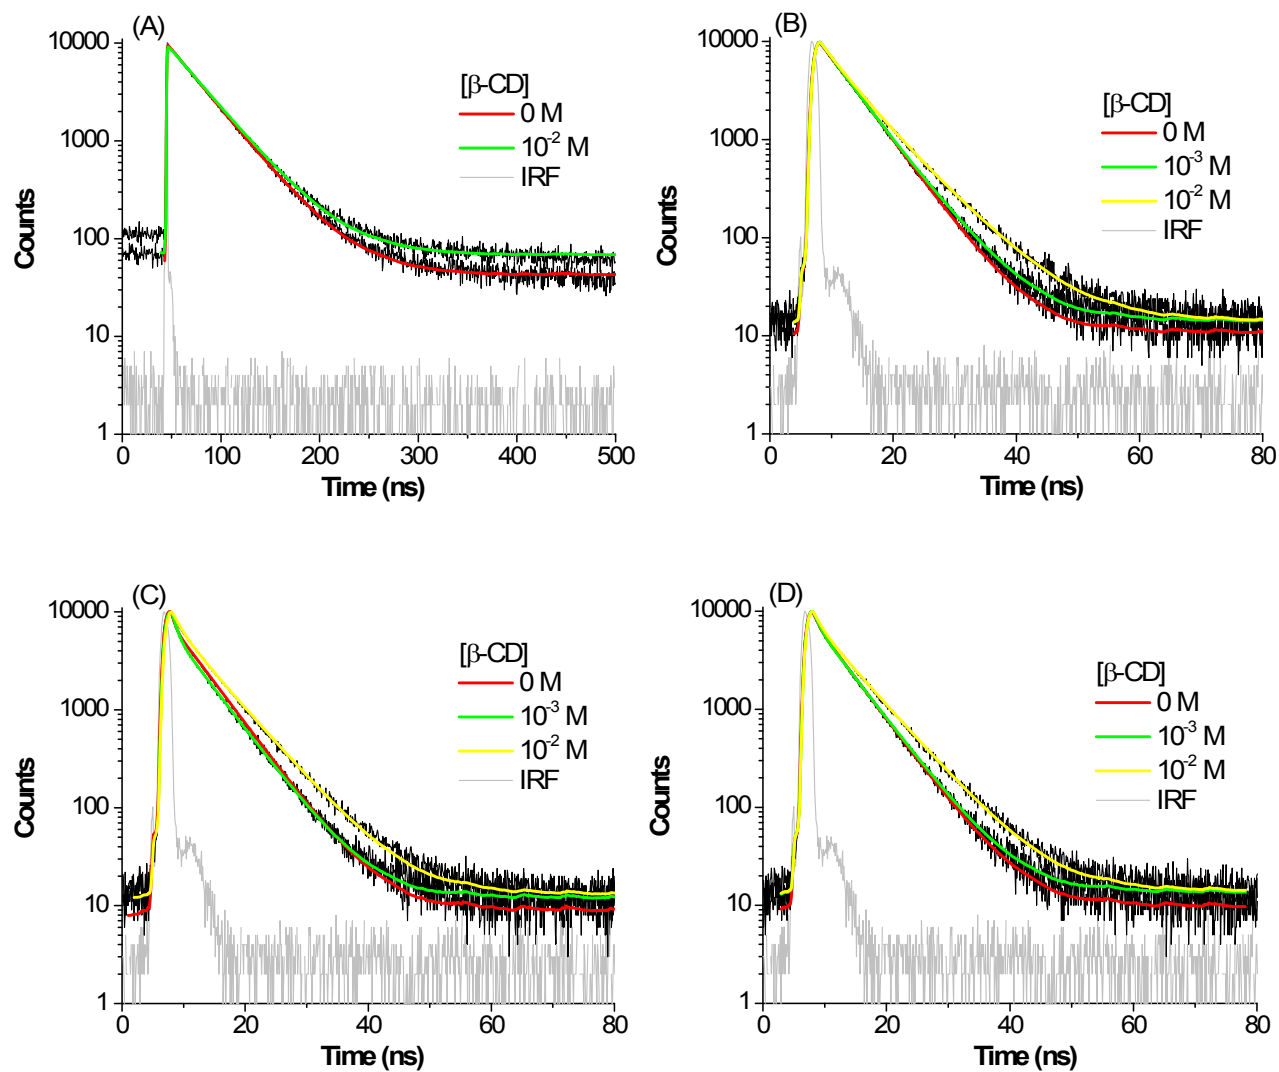

**Fig. S9.** Fitted fluorescence intensity decays of (A) PyCOO<sup>-</sup>, (B) Py(EG)<sub>6</sub>, (C) Py(EG)<sub>2</sub>T and (D) Py(EG)<sub>3</sub>T in the absence and in the presence of  $\beta$ -CD;  $\lambda_{em} = 380$  nm for PyCOO<sup>-</sup> and 415 nm for Py(EG)<sub>n</sub>T; IRF = instrument response function.

**Table S3.** Fluorescence decay fitting parameters of Py(EG)<sub>n</sub>T, Py(EG)<sub>n</sub> and PyCOO<sup>-</sup> in the absence and in the presence of β-CD; λ<sub>em</sub> = 415 nm for Py(EG)<sub>n</sub>T and Py(EG)<sub>n</sub>, and 380 nm for PyCOO<sup>-</sup>

| Probe                 | [β-CD]<br>(M)    | τ <sub>1</sub><br>(ns) | B <sub>1</sub> | f <sub>1</sub> | a <sub>1</sub> | τ <sub>2</sub><br>(ns) | B <sub>2</sub> | f <sub>2</sub> | a <sub>2</sub> | <τ><br>(ns) | χ <sup>2</sup> |
|-----------------------|------------------|------------------------|----------------|----------------|----------------|------------------------|----------------|----------------|----------------|-------------|----------------|
| Py(EG) <sub>1</sub> T | 0                | 5.17                   | 0.087          | –              | –              | –                      | –              | –              | –              | –           | 1.05           |
|                       | 10 <sup>-3</sup> | 5.35                   | 0.071          | 0.90           | 0.72           | 1.45                   | 0.028          | 0.10           | 0.28           | 4.98        | 1.03           |
|                       | 10 <sup>-2</sup> | 6.35                   | 0.053          | 0.78           | 0.62           | 2.79                   | 0.033          | 0.21           | 0.38           | 5.58        | 1.07           |
| Py(EG) <sub>2</sub> T | 0                | 5.18                   | 0.064          | 0.86           | 0.47           | 0.76                   | 0.071          | 0.14           | 0.53           | 4.56        | 1.03           |
|                       | 10 <sup>-3</sup> | 5.26                   | 0.052          | 0.79           | 0.39           | 0.91                   | 0.080          | 0.21           | 0.61           | 4.34        | 1.10           |
|                       | 10 <sup>-2</sup> | 6.05                   | 0.063          | 0.85           | 0.62           | 1.75                   | 0.038          | 0.15           | 0.38           | 5.41        | 1.07           |
| Py(EG) <sub>3</sub> T | 0                | 5.17                   | 0.068          | 0.89           | 0.61           | 1.01                   | 0.043          | 0.11           | 0.39           | 4.71        | 1.12           |
|                       | 10 <sup>-3</sup> | 5.28                   | 0.065          | 0.87           | 0.57           | 1.02                   | 0.050          | 0.13           | 0.43           | 4.73        | 1.08           |
|                       | 10 <sup>-2</sup> | 6.12                   | 0.064          | 0.88           | 0.62           | 1.42                   | 0.039          | 0.12           | 0.38           | 5.54        | 1.16           |
| Py(EG) <sub>6</sub> T | 0                | 5.15                   | 0.090          | –              | –              | –                      | –              | –              | –              | –           | 1.19           |
|                       | 10 <sup>-3</sup> | 5.70                   | 0.067          | 0.84           | 0.76           | 3.48                   | 0.021          | 0.16           | 0.24           | 4.92        | 1.22           |
|                       | 10 <sup>-2</sup> | 7.96                   | 0.048          | 0.70           | 0.55           | 4.05                   | 0.040          | 0.30           | 0.45           | 5.21        | 1.17           |
| Py(EG) <sub>1</sub>   | 0                | 5.22                   | 0.088          | 1              | –              | –                      | –              | –              | –              | –           | 1.06           |
|                       | 10 <sup>-3</sup> | 5.49                   | 0.082          | 0.96           | 0.91           | 2.38                   | 0.008          | 0.04           | 0.09           | 5.36        | 1.10           |
|                       | 10 <sup>-2</sup> | 8.22                   | 0.045          | 0.66           | 0.52           | 4.55                   | 0.041          | 0.34           | 0.48           | 6.99        | 1.11           |
| Py(EG) <sub>6</sub>   | 0                | 5.12                   | 0.089          | 1              | –              | –                      | –              | –              | –              | –           | 1.23           |
|                       | 10 <sup>-3</sup> | 5.48                   | 0.073          | 0.88           | 0.80           | 2.92                   | 0.018          | 0.12           | 0.20           | 5.18        | 1.01           |
|                       | 10 <sup>-2</sup> | 6.91                   | 0.051          | 0.72           | 0.57           | 3.58                   | 0.039          | 0.28           | 0.43           | 5.96        | 1.20           |
| PyCOO <sup>-</sup>    | 0                | 35.20                  | 0.332          | 1              | 1              | –                      | –              | –              | –              | –           | 1.01           |
|                       | 10 <sup>-2</sup> | 36.47                  | 0.501          | 1              | 1              | –                      | –              | –              | –              | –           | 1.15           |

Note: The maximum error in τ is ±0.02 ns.

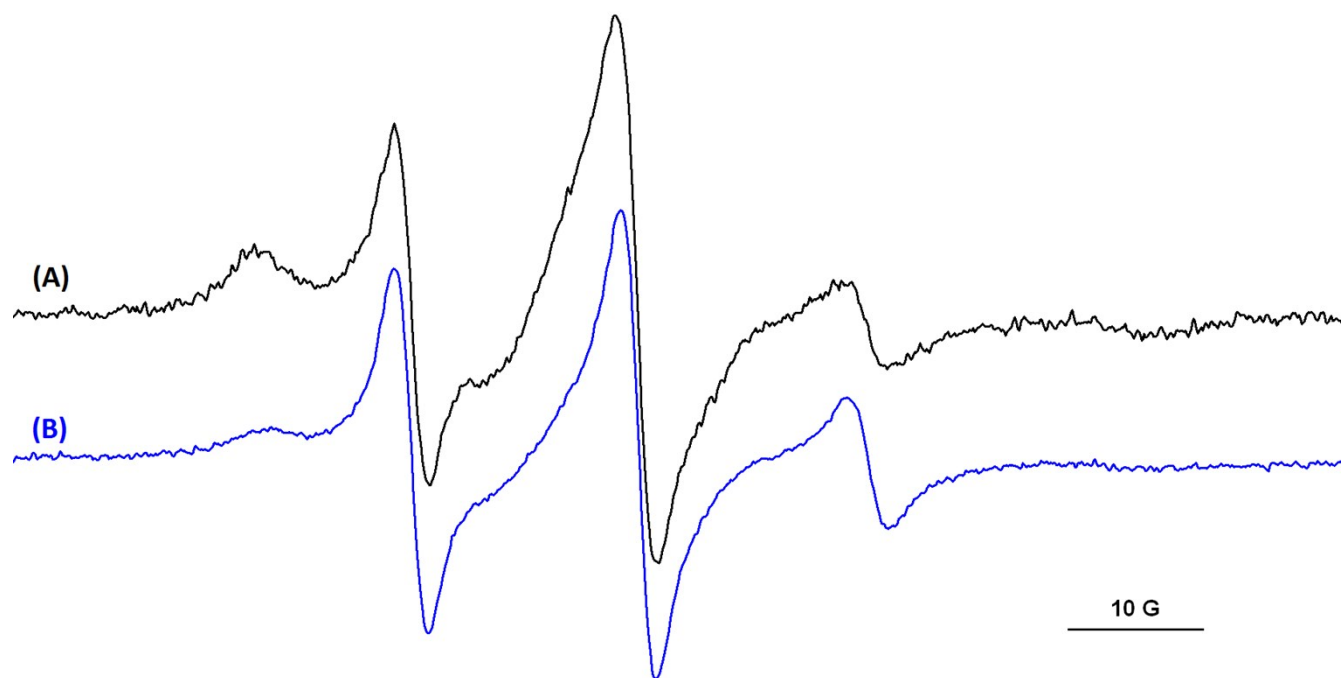

**Fig. S10.** EPR spectra of Py(EG)<sub>6</sub>T loaded in PEG900/β-CD (A) without adamantol and (B) with adamantol.

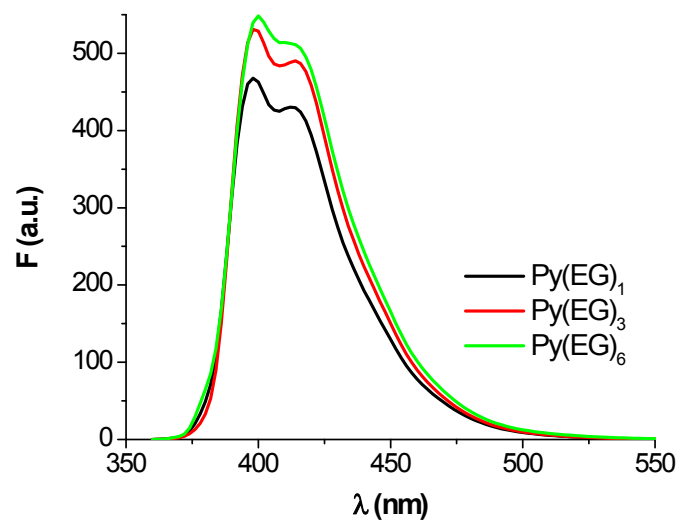

**Fig. S11.** Steady-state fluorescence spectra of Py(EG)<sub>n</sub> probes after diffusion in PEG900/ $\beta$ -CD gel.
